# Supplementary material
Source: publisher site journal article supplement (https://www.dovepress.com/article/395087)
Supplement: Supplementary file 1 [file get_supplementary_file.php]

Appendix 1. Questionnaire on current motivation


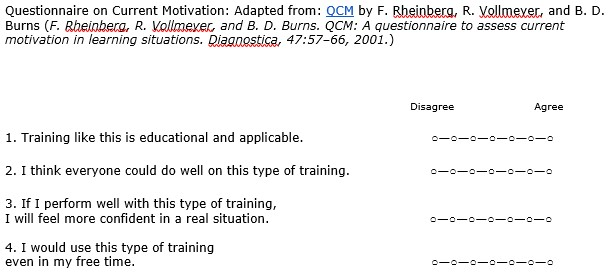


***Note.*** Adapted from: F. Rheinberg, R. Vollmeyer, and B. D. Burns. QCS: A questionnaire to assess current motivation in learning situations. Diagnostica, 47:57-66, 2001.
